# Supplementary material
Source: PubMed Central journal article supplement (PMC3880584)
Supplement: NIHMS54918-supplement-Appendix_2.pdf [file NIHMS54918-supplement-Appendix_2.pdf]

## Supporting Information

### Appendix S2 : Details of the legend of Figures 3 and 4.

**Figure 3:** Examples on successive combinations of socio-economic scenarios, projections of extinction drivers, habitat or species range models and extinction models and biodiversity metrics, leading to projections of biodiversity losses following climate change. Numbers correspond to references (see Appendix S2). \* (1) also used species extinction model that corresponds to the extreme of the IUCN status approach where the number of species committed to extinction =100% habitat loss.\*\* (6) also used both Dose Response Relationships between conservation status and the elevation limits and then estimated the effects of elevational limit shifts induced by climate change on the future conservation status.

**Figure 4:** Overview of projections of loss of biodiversity due to climate change, for different taxonomic, temporal and spatial scales. The width of the box illustrates the spatial and taxonomic scales: global scale and several taxonomic groups, global scale and only one taxonomic group, continental scale and only one taxonomic group (🌿 for plants, 🐟 for fish, 🐠 for aquatic invertebrates, 🦌 for mammals, 🦎 for lizards and 🐦 for birds, 🏞️ for several taxonomic groups). For each study, the box is delimited by the upper and lower boundaries of the intermediate scenario, while maximum and minimum values of the whiskers indicate the highest and lowest biodiversity losses across all projections. The numbers correspond to references (see Appendix S2). Note that biodiversity loss given by studies (11, 12, 13, 5) are local, therefore are respectively expressed per cell of 50 sq.km across Europe (10), per cell of 30' lat. by 30' long. grid of world ocean (12), per river (13) and per pixel of 10' grid (5). When there was no intermediate scenario (11), we defined the upper and lower limits of the box as the two middle values across all projections. In studies with more than one driver of species extinctions (*e.g.*, land-use changes (2), (6) and (1) or land-use changes, atmospheric nitrogen deposition and infrastructure development (7) and (8) or climate change and water withdrawal (12)), we calculated the mean proportion of losses due to climate change among the drivers, across all scenarios when it is possible (7),

(2) and (1). For these studies, the white fraction of the boxes indicates the proportion of species loss due to non-climate drivers for the intermediate scenarios and the coloured fraction indicates proportion of losses due to climate change. This figure illustrates that the different studies (i) generally predict significant biodiversity loss and (ii) use a combination of different biodiversity metrics, taxonomic groups and spatial scale and time horizon, making generalisations difficult.

#### **Appendix S2 : References cited in Table 1, Figure 3 and Figure 4.**

- (1) Jetz W., Wilcove D.S. & Dobson A.P. (2007) Projected Impacts of Climate and Land-Use Change on the Global Diversity of Birds. *Plos biology*, 5, 1211-1219
- (2) van Vuuren D.P., Sala O.E. & Pereira H.M. (2006) The future of vascular plant diversity under four global scenarios. *Ecology and Society*, 11
- (3) Thomas C.D., Cameron A., Green R.E., Bakkenes M., Beaumont L.J., Collingham Y.C., Erasmus B.F.N., de Siqueira M.F., Grainger A., Hannah L., Hughes L., Huntley B., van Jaarsveld A.S., Midgley G.F., Miles L., Ortega-Huerta M.A., Townsend Peterson A., Phillips O.L. & Williams S.E. (2004) Extinction risk from climate change. *Nature*, 427, 145-148
- (4) Malcolm J.R., Liu C.R., Neilson R.P., Hansen L. & Hannah L. (2006) Global warming and extinctions of endemic species from biodiversity hotspots. *Conservation Biology*, 20, 538-548
- (5) Thuiller W., Lavorel S., Araújo M.B., Sykes M.T. & Prentice I.C. (2005) Climate change threats to plant diversity in Europe. *Proceedings of the National Academy of Sciences of the United States of America*, 102, 8245-8250
- (6) Sekercioglu C.H., Schneider S.H., Fay J.P. & Loarie S.R. (2008) Climate Change, Elevational Range Shifts, and Bird Extinctions. *Conservation biology*, 22, 140-150
- (7) Alkemade R., van Oorschot M., Miles L., Nellemann C., Bakkenes M. & ten Brink B. (2009) GLOBIO3: A Framework to Investigate Options for Reducing Global Terrestrial Biodiversity Loss. *Ecosystems*, 12, 374-390
- (8) Biggs R., Simons H., Bakkenes M., Scholes R.J., Eickhout B., van Vuuren D. & Alkemade R. (2008) Scenarios of biodiversity loss in southern Africa in the 21st century. *Global Environmental Change-Human and Policy Dimensions*, 18, 296-309
- (9) Thuiller W., Broennimann O., Hughes G., Alkemade J.R.M., Midgley G.F. & Corsi F. (2006) Vulnerability of African mammals to anthropogenic climate change under conservative land transformation assumptions. *Global Change Biology*, 12, 424-440
- (10) Sinervo B., Mendez-de-la-Cruz F., Miles D.B., Heulin B., Bastiaans E., Villagran-Santa Cruz M., Lara-Resendiz R., Martinez-Mendez N., Calderon-Espinosa M.L., Meza-Lazaro R.N.,

- Gadsden H., Avila L.J., Morando M., De la Riva I.J., Sepulveda P.V., Rocha C.F.D., Ibarquengoytia N., Puntriano C.A., Massot M., Lepetz V., Oksanen T.A., Chapple D.G., Bauer A.M., Branch W.R., Clobert J. & Sites J.W., Jr. (2010) Erosion of Lizard Diversity by Climate Change and Altered Thermal Niches. *Science*, 328, 894-899
- (11) Bakkenes M., Alkemade J.M.R., Ihle F., Leemans R. & Latour J.B. (2002) Assessing effects of forecasted climate change on the diversity and distribution of European higher plants for 2050. *Global Change Biology*, 8, 390-407
- (12) Cheung W.L., Lam W.Y., Sarmiento J.L., Kearney K., Watson R. & Pauly D. (2009) Projecting global marine biodiversity impacts under climate change scenarios. *Fish and Fisheries*, 10, 235-251
- (13) Xenopoulos M.A., Lodge D.M., Alcamo J., Marker M., Schulze K. & Van Vuuren D.P. (2005) Scenarios of freshwater fish extinctions from climate change and water withdrawal. *Global Change Biology*, 11, 1557-1564
- (14) Maclean I.M.D. & Wilson R.J. (2011) Recent ecological responses to climate change support predictions of high extinction risk. *Proceedings of the National Academy of Sciences of the United States of America*, 108, 12337-12342
- (15) Pearson R.G. & Dawson T.P. (2003) Predicting the impacts of climate change on the distribution of species: are bioclimate envelope models useful? *Global Ecology and Biogeography*, 12, 361-371
- (16) Svenning J.-C. & Skov F. (2006) Potential impact of climate change on the northern nemoral forest herb flora of Europe. *Biodiversity conservation*, 15, 3341-3356
- (17) Broennimann O., Thuiller W., Hughes G., Midgley G.F., Alkemade J.M.R. & Guisan A. (2006) Do geographic distribution, niche property and life form explain plants' vulnerability to global change? *Global Change Biology*, 12, 1079-1093
- (18) Sala O., van Vuuren D., Pereira H., Lodge D., Alder J., Cumming G., Dobson A., Wolters V., MA X., Zaitsev A., Polo M., Gomes I., Queiroz C. & JA R. (2005) Chap 10: Biodiversity across Scenarios. In: *Millenium Ecosystem Assesment*, pp. 375-408. Millenium Ecosystem Assesment
- (19) Botkin D.B., Saxe H., Araujo M.B., Betts R., Bradshaw R.H.W., Cedhagen T., Chesson P., Dawson T.P., Etterson J.R., Faith D.P., Ferrier S., Guisan A., Hansen A.S., Hilbert D.W., Loehle C., Margules C., New M., Sobel M.J. & Stockwell D.R.B. (2007) Forecasting the effects of global warming on biodiversity. *Bioscience*, 57, 227-236
- (20) Lomolino M.v. (2001) The species-area relationship: new challenges for an old pattern. *Progr. Phys; Geogr.*, 25, 1-21
- (21) Lewis O.T. (2006) Climate change, species area-curves and the extinction crisis. *The Royal society*, 361, 163-171
- (22) Akçakaya H., Butchart S.H.M., Mace G.M., Stuart S.N. & Hilton-Taylor C. (2006) Use and misuse of the IUCN Red List Criteria in projecting climate change impacts on biodiversity. *Global Change Biology*, 12, 2037-2043
